# Supplementary material for: Mercury-Pollution Induction of Intracellular Lipid Accumulation and Lysosomal Compartment Amplification in the Benthic Foraminifer Ammonia parkinsoniana
Source: PLoS One. 2016 Sep 7;11(9):e0162401. doi: 10.1371/journal.pone.0162401 (PMC5014445; doi:10.1371/journal.pone.0162401)
Supplement: S1 Appendix — (XLSX) [file pone.0162401.s001.xlsx]

## Sheet: Foglio1
	T1			T2
n	ctrl	1ppm	100ppm	ctrl	1ppm	100ppm
1	949771	1.9898e+06	1.05828e+06	3.963e+06	1.25565e+06	1.76054e+06
2	698641	1.45006e+06	926590	1.4309e+06	729550	3.02375e+06
3	822110	1.51894e+06	712862	1.58339e+06	1.86592e+06	6.96915e+06
4	313521	2.62391e+06	759471	1.95725e+06	1.94434e+06	1.83386e+06
5	921411	2.29239e+06	974185	1.40616e+06	1.63567e+06	4.58206e+06
6	563582	590216	790462	1.55445e+06	1.18717e+06	9.98229e+06
7	1.30694e+06	2.22909e+06	1.27792e+06	2.58709e+06	1.40057e+06	3.07257e+06
8	749607	1.62211e+06	1.19054e+06	2.00147e+06	322481	5.332e+06
9	851949	1.18915e+06	795558	1.06691e+06	668720	4.91466e+06
10	470693	2.63723e+06	667486	2.76875e+06	1.19482e+06	5.66484e+06
11	1.02967e+06	2.68548e+06	478256	1.74245e+06	990215	5.22004e+06
12	689599	2.22802e+06	679406	2.22145e+06	401643	3.60303e+06
13	1.04883e+06	1.26855e+06	433702	1.20148e+06	660335	832550
14	969582	1.15347e+06	1.11212e+06	2.00369e+06	1.06757e+06	2.65671e+06
15	717137	1.42811e+06	972870	1.39145e+06	834111	3.48647e+06
16	818082	935221	559308	540319	949278	2157576
17	942208	1.36736e+06	616685	1.02507e+06	918123	1.11368e+06
18	1.13769e+06	2.92477e+06	1.29765e+06	801148	447430	1.28672e+06
19	753306	1.07373e+06	815123	1.59325e+06	1.1533e+06	538593
20	430825	2.11508e+06	1.08269e+06	975254	1.19728e+06	1.68277e+06
21	349608	576735	665431	1.872e+06	1.55708e+06	1.99218e+06
22	832467	1.61454e+06	881542	1.26313e+06	1.53703e+06	1.81915e+06
23	1.30538e+06	2.00772e+06	742373	939167	1.69864e+06	1.16605e+06
24	1.27201e+06	2.50751e+06	927576	1.24776e+06	645867	1.02071e+06
25	598272	2.25219e+06	924617	1.02877e+06	914917	1.41594e+06
26	904066	1.18142e+06	684502	971143	1.70678e+06	1.45417e+06
27	1.24463e+06	1.25392e+06	899463	843236	817507	2.87282e+06
28	917465	1.23764e+06	673652	1.18388e+06	853183	4.63722e+06
29	1.31122e+06	597614	526755	866664	695435	4.19612e+06
30	1.22014e+06	755937	928398	1.73957e+06	1.25852e+06	1.18208e+07
31	553636	591120	1.17501e+06	1.33514e+06	524782	2.14894e+06
32	666007	1.91869e+06	965389	764075	825069	1.39589e+06
33	798518	1.48179e+06	879981	1.3113e+06	1.26658e+06	4.22547e+06
34	3.98248e+06	820137	667158	811835	937687	4.19653e+06
35	547799	3.24298e+06	917958	820548	529304	962266
36	882940	959306	751826	643565	661157	1.84833e+06
37	642990	819726	1.0406e+06	731029	1.00156e+06	550676
38	1.12157e+06	1598926	563993	1.33514e+06	1.83361e+06	2.82432e+06
39	707108	817096	784708	714506	1.27201e+06	3.10225e+06
40	1.46304e+06	1.77328e+06	605917	1.29256e+06	1.93111e+06	9.58073e+06
41	1.4836e+06	2.2951e+06	1.34484e+06	534071	966787	1.43117e+07
42	1.06469e+06	696751	792352	1.17846e+06	870281	1.03808e+07
43	859594	1.29995e+06	2.05836e+06	787009	690996	7.1943e+06
44	964649	946154	5.20689e+06	1.56752e+06	859266	2.82268e+06
45	1.07086e+06	1.29584e+06	480064	1.2291e+06	1.26469e+06	8.3629e+06
46	587668	1.45145e+06	1.09552e+06	872665	936701	1.21545e+06
47	1.06083e+06	2.11582e+06	994242	777556	1.13917e+06	2.30373e+06
48	1.21076e+06	2.20451e+06	1.11089e+06	389312	1.53785e+06	1.75256e+06
49	1.45622e+06	1.56966e+06	918369	247759	1.01159e+06	3.01479e+06
50	1.12133e+06	9.19528e+06	739003	1.10818e+06	843154	1.44299e+06
51	938427	2.91039e+06	1.21134e+06	1.53292e+06	670117	2.15881e+06
52	1.14196e+06	1.10949e+06	1.54188e+06	1.49371e+06	735550	1.0531e+06
53	936207	1.38183e+06	1.01044e+06	944756	1.49642e+06	2.36736e+06
54	661650	2.41693e+06	1.00887e+06	807149	771802	2.41183e+06
55	815534	1.34278e+06	1.05096e+06	770898	1.26091e+06	403944
56	741140	1.22277e+06	931686	458034	1.49264e+06	536948
57	663705	1.8457e+06	1.19293e+06	540648	459596	4.32543e+06
58	625481	801313	1.51179e+06	1.03238e+06	1.60065e+06	1.7302e+06
59	1.03822e+06	1.44702e+06	1.32675e+06	950839	843811	1.40435e+06
60	753717	732838	1.11919e+06	592353	776981	2.07217e+06
61	1.0545e+06	1.02351e+06	1.31927e+06	822439	781831	1.05984e+06
62	982570	1.47159e+06	1.20452e+06	1.85351e+06	700121	2.17706e+06
63	766376	2.13505e+06	674063	1.31763e+06	1.34845e+06	2.71508e+06
64	725439	391861	1.57303e+06	860992	1.17903e+06	603779
65	733495	918863	1.47324e+06	1.29256e+06	1.38865e+06	1.81093e+06
66	381585	1.27998e+06	1.3219e+06	2.90126e+06	995804	4.05695e+06
67	959388	2.15158e+06	1.08919e+06	744264	731440	1.35026e+06
68	823178	986433	1.10686e+06	638962	514754	4.01955e+06
69	899298	1.23921e+06	1.33851e+06	512534	1.14155e+06	737934
70	829837	1.30686e+06	985118	606903	752073	1.73489e+06
71	573446	2.76785e+06	1.50267e+06	669870	860745	2.42054e+06
72	1.09691e+06	2.05992e+06	789393	461486	975171	859512
73	874555	382489	1.06132e+06	567692	956594	2.6064e+06
74	682612	1.5159e+06	1.24208e+06	553553	1.04636e+06	819808
75	496423	1.12684e+06	1.127e+06	631235	1.38051e+06	850634
76	645210	674638	1.21898e+06	537113	2.08491e+06	3.24199e+06
77	826795	767034	1.32075e+06	429427	1.23485e+06	4.49468e+06
78	710561	1.72494e+06	990543	674063	1.25951e+06	2.5778e+06
79	1.02893e+06	1.05072e+06	1.04019e+06	429756	1.63616e+06	6.34408e+06
80	1.19161e+06	824905	957744	406657	872007	1.02885e+06
81	1.48162e+06	537195	129716	552074	1.0605e+06	2.80484e+06
82	1.34402e+06	1.36235e+06	1.63033e+06	1.2605e+06	891982	844962
83	1.39597e+06	1.13004e+06	1.12018e+06	968020	1.69469e+06	6.65892e+06
84	791941	831810	1.38865e+06	2.43361e+06	644470	4.46336e+06
85	1.28203e+06	1.77377e+06	1.63296e+06	2.78026e+06	597696	1.39325e+06
86	731769	1.43477e+06	893708	1.49239e+06	1.59679e+06	586270
87	1.46921e+06	731440	1.92667e+06	682776	988488	2.71483e+06
88	1.50941e+06	826138	1.28195e+06	2.66205e+06	1.39654e+06	1.32831e+06
89	3.27455e+06	864362	871596	1.7621e+06	1.20271e+06	3.59859e+06
90	635674	1.64052e+06	1.26222e+06	561445	1.7875e+06	1.30587e+06
91	1.21849e+06	444306	1.32412e+06	1.24266e+06	543936	2.09839e+06
92	2.48935e+06	1.40419e+06	872089	990626	992105	914095
93	1.94253e+06	928809	1.00805e+06	2.15223e+06	1.48277e+06	700614
94	1.62301e+06	803861	982570	2.74311e+06	1.65145e+06	733577
95	1.77985e+06	1.80271e+06	1.43057e+06	1.07866e+06	549279	1.01611e+06
96	2.1339e+06	1.68729e+06	1.02893e+06	1.30382e+06	1.12314e+06	808957
97	2.37245e+06	571474	1.11837e+06	1.06921e+06	1.32914e+06	1.2757e+06
98	837893	1.4388e+06	923795	1.57673e+06	669953	1.12347e+06
99	988159	1.52609e+06	938180	1.90727e+06	686886	2.48557e+06
100	1.81775e+06	1.08516e+06	1.22778e+06	1.10653e+06	1099462	5.20483e+06
101	2.31861e+06	858690	1.25984e+06	578790	1.36744e+06	3.83903e+06
102	3.0886e+06	1.22729e+06	1.78101e+06	1.22984e+06	1.12996e+06	1.28039e+06
103	1.18882e+06	739085	1.58265e+06	2.54648e+06	442580	3.48827e+06
104	891078	1.17049e+06	1.26929e+06	440031	693216	3.26707e+06
105	1.99662e+06	664034	608958	1.12248e+06	1.47044e+06	1.57246e+06
106	486229	782324	857704	1.02556e+06	1.15166e+06	731111
107	696668	2.18051e+06	1.25828e+06	1.73982e+06	1.1963e+06	1.25392e+06
108	2.25474e+06	814629	1.31689e+06	2.19728e+06	1.47669e+06	811424
109	1.49823e+06	1.25688e+06	1.01307e+06	1.22301e+06	1.59021e+06	675953
110	1.31705e+06	933906	771966	656800	1.27151e+06	1.18257e+06
111	1.77122e+06	1.4859e+06	1.2577e+06	536866	1.65984e+06	826549
112	888530	1.25721e+06	1.16966e+06	1.57394e+06	1.2993e+06	883515
113	897983	2.22013e+06	909491	3.74598e+06	1.31023e+06	2.71006e+06
114	917136	673898	1.61915e+06	1.49535e+06	1.37164e+06	2.7556e+06
115	1.81569e+06	1.54196e+06	726344	2.15034e+06	1.58709e+06	1.17805e+06
116	1.78914e+06	1.20822e+06	666664	890914	985200	883680
117	1.25894e+06	2.3704e+06	954785	906121	1.74985e+06	953223
118	967198	1.56481e+06	1.45869e+06	1.05976e+06	970815	2.17714e+06
119	1.24282e+06	371310	1.45499e+06	787420	1.32947e+06	1.57928e+06
120	940811	838550	1.1159e+06	1.47348e+06	1.55807e+06	687626
121	1.00616e+06	1.8531e+06	1.23469e+06	2.17763e+06	631564	978542
122	2.0175e+06	1.02047e+06	1.29543e+06	1.10546e+06	785036	1.02597e+06
123	2.80887e+06	1.04406e+06	743935	1.27168e+06	1.93226e+06	1.436e+06
124	1.17344e+06	716233	1.13415e+06	1.16966e+06	858854	2.94146e+06
125	1.67981e+06	1.54829e+06	1.1843e+06	525933	1.20764e+06	4.67808e+06
126	827371	812903	659102	1.38947e+06	747470	806245
127	756101	949606	948784	1.80501e+06	1.75388e+06	2.25145e+06
128	1.89954e+06	972459	1.41027e+06	1.90793e+06	1.04883e+06	4.2766e+06
129	3.18478e+06	1.85285e+06	1.3903e+06	2.05301e+06	1.19663e+06	962266
130	1.40271e+06	842142	1.5598e+06	2.5459e+06	644059	926507
131	1.71113e+06		864855	2.12716e+06	1.29502e+06	645538
132	3.05975e+06		1.21315e+06	1.27661e+06	843565	3.39785e+06
133	1.41619e+06		1.00649e+06	1.06979e+06	1.88705e+06	1.29346e+06
134	2.57566e+06		980679	1.00624e+06	940071	5.57606e+06
135	1.63592e+06		950100	3.27734e+06	872911	3.48203e+06
136	2.00484e+06		1.1889e+06	1.58783e+06	1.64784e+06	733577
137	1.0619e+06		1.62153e+06	1.25195e+06	1.0374e+06	927576
138	1.57903e+06		1.26231e+06	1.49527e+06	1.68647e+06	2.024e+06
139	1.98174e+06		1.13382e+06	2.47323e+06	911629	2.72058e+06
140	2.11763e+06		958895	1.68812e+06	752977	3.22038e+06
141	799915		1.40024e+06	1.62934e+06	1.11426e+06	4.18396e+06
142	1.23584e+06		1.23033e+06	2.11656e+06	1.08039e+06	758238
143	1.49625e+06		1.03888e+06	1.90776e+06	570158	793750
144	1.68006e+06		820384	2.24726e+06	1.34163e+06	3.25819e+06
145	770898		1.2988e+06	4.69181e+06	1.07669e+06	4.06895e+06
146	1.60427e+06		1.13358e+06	6.27462e+06	952237	1.40378e+06
147	1.71837e+06		2.16391e+06	1.71952e+06	1.00986e+06	1.00682e+06
148	660417		687462	812492	1.41808e+06	3.16037e+06
149	1.59917e+06		653101	2.39144e+06	1.32757e+06	833043
150	967855		1.13218e+06	1.93678e+06	1.23691e+06	678584
151	1.11927e+06		1.34106e+06	1.84915e+06	1.19605e+06	3.02391e+06
152	1.29798e+06		782653	1.05713e+06	537359	1.81586e+06
153	992434		1.29987e+06	2.7699e+06	1.0933e+06	2.70981e+06
154	858279		1.9718e+06	1.47957e+06	606821	1.6494e+06
155	1.11862e+06		1.08845e+06	1.79753e+06	1.69814e+06	2.24224e+06
156	2.25063e+06		1.6166e+06	1.13456e+06	824494	2.15725e+06
157	1.26584e+06		1.79942e+06	807642	1.40879e+06	988242
158	939495		1.48458e+06	1.18372e+06	729714	929384
159	1.59202e+06		1.5233e+06	2.24553e+06	1.24841e+06	1.1727e+06
160	3.0831e+06		1.30612e+06	1.20879e+06	616850	1.43781e+06
161	1.48121e+06		1.38676e+06	1.4457e+06	1.15339e+06	1.09149e+06
162	1.83912e+06		1.52979e+06	662225	634359	2.14664e+06
163	810273		1.40715e+06	1.44923e+06	1.69469e+06	3.01807e+06
164	2.64446e+06		387422	1.28006e+06	917383	1.8762e+06
165	2.1122e+06		1.66017e+06	1.34385e+06	1.38569e+06
166	1.60953e+06		1.77213e+06	1.25318e+06	783228
167	708917		1.0896e+06	2.89247e+06	1.44702e+06
168	806409		351746	1.15922e+06	1.24299e+06
169	332921		1.36259e+06	1.20978e+06	776405
170	1.55018e+06		948867	657458	1.54928e+06
171	2.32387e+06		759965	1.65096e+06	630577
172	887461		1.35413e+06	1.13588e+06	1.2152e+06
173	977309		1.41857e+06	1.51311e+06	813314
174	1.89157e+06		1.37739e+06	839537	701601
175	1.06543e+06		1.13785e+06	1.8295e+06	655156
176	855238		1.01274e+06	1.36489e+06	589723
177	1.75708e+06		878254	2.17311e+06	773035
178	1.11664e+06		779611	1.74114e+06	1.11467e+06
179	1.08014e+06		1.23691e+06	1.65458e+06	972459
180	1.86345e+06		1.90867e+06	1.78207e+06	1.89617e+06
181	2.06617e+06		589723	804683	828111
182	620631		949771	501683	1.90932e+06
183	2.74598e+06		1.10472e+06	564897	542456
184	2.88589e+06		764239	1.3076e+06	927083
185	1.19613e+06		1.57361e+06	985118	1.01019e+06
186	831563		792681	1.6993e+06	769582
187	2.06403e+06		1.91179e+06	2.21594e+06	1.98446e+06
188	890749		3.25794e+06	1.29108e+06	1.24003e+06
189	962759		2.43049e+06	1.62202e+06	663705
190	1.65154e+06		1.82712e+06	851785	559883
191	573775		1.53588e+06	672994	836906
192	745826		1.13127e+06	1.21101e+06	761362
193	1.45959e+06		935303	841428	1.09231e+06
194	585284		921904	992352	721165
195	1.23485e+06		1.09585e+06	3.46666e+06	910067
196	1.05507e+06		844962	1.73793e+06	1.26806e+06
197	458363		935385	2.60953e+06	695353
198	524536		974349	1.82893e+06	653512
199	888859		1.01192e+06	1.00123e+06	590956
200	977966		1.34813e+06	1.20772e+06	1.47168e+06
201	471104		1.79161e+06		1.62285e+06
202	625727		2.65762e+06		1.57484e+06
203	828357		2.92946e+06		1.49979e+06
204	1.50834e+06		936536		766787
205	1.55708e+06		1.59934e+06		1.17164e+06
206	1.28294e+06		1.01611e+06		1.48787e+06
207	1.38808e+06		912286		1.73818e+06
208	747799		1.612e+06		1.60139e+06
209	1.06716e+06		1.0383e+06		1.33555e+06
210	676036		1.25203e+06		896175
211	804683		813479		687462
212	1.50193e+06		1.31089e+06		1.13728e+06
213	1.69897e+06		1.0217e+06		1.05417e+06
214	1.02227e+06		2.02728e+06		1.28623e+06
215	1.76235e+06		1.56013e+06		1.24036e+06
216	1.76202e+06		782817		1.0249e+06
217	495929		1.05754e+06		1.02943e+06
218	1.57805e+06		2.24775e+06		1.40468e+06
219	528317		1.58857e+06		1.26954e+06
220	1.47324e+06		2.16678e+06		920918
221	1.21668e+06		1.50119e+06		1.60665e+06
222	976733		2.14533e+06		1.04809e+06
223	959882		1.45318e+06		939989
224	1.65548e+06		1.72494e+06		1.07513e+06
225	992681		1.12692e+06		780022
226	1.0674e+06		1.24143e+06		1.48894e+06
227	1.52166e+06		1.90669e+06		914424
228	824658		625399		1.12116e+06
229	1.1681e+06		1.83509e+06		1.55996e+06
230	872993		1.41644e+06		2.36744e+06
231	1.71853e+06		779447		1.27809e+06
232	687544		2.52478e+06		1.45967e+06
233	1.48401e+06		1.84636e+06		1.67891e+06
234	2.02852e+06		1.40386e+06		1.35125e+06
235			1.79843e+06		1.08943e+06
236			1.53916e+06		840359
237			934234		1.57435e+06
238			604684		1.84784e+06
239			816438		1.43337e+06
240			950264		1.79062e+06
241			1.39819e+06		1.30489e+06
242			1.3612e+06		1.17731e+06
243			1.14747e+06		1.60435e+06
244			774597		1.40805e+06
245			849977		607889
246			542456		1.70275e+06
247			587750		656060
248			945085		579776
249			980843		1.74262e+06
250			1.20887e+06		747552
251			2.48096e+06		2.19333e+06
252			1.32716e+06		2.02523e+06
253			1.30563e+06		1.14073e+06
254			1.81282e+06		744182
255			1.28171e+06		1.49387e+06
256					1.87998e+06
257					1.21652e+06
258					791859
259					1.3524e+06
260					1.28236e+06
261					1.20665e+06
262					1.10061e+06
263					1.52979e+06
264					876117
265					1.18734e+06
266					871021
267					1.40394e+06
268					1.0522e+06
269					1.20419e+06
270					1.31894e+06
271					1.31072e+06
272					1.65828e+06
273					841756
274					1.49593e+06
275					1.23912e+06
276					1.16728e+06
277					1.30053e+06
278					1.19794e+06
279					1.12215e+06
280					1.70735e+06
281					875295
282					1.55939e+06
283					1.63731e+06
284					1.52379e+06
285					1.66535e+06
286					1.60016e+06
287					728892
288					818082
289					2.32321e+06
290					1.18619e+06
291					1.48023e+06
292					761773
293					810930
294					1.79144e+06
295					1.97706e+06
296					1.43107e+06
297					1.31993e+06
298					1.05417e+06
299					1.39868e+06
300					867815
301					1.266e+06
302					1.49231e+06
303					1.53004e+06
304					980186
305					1.07875e+06
306					1.08072e+06
307					959553
308					2.25236e+06
309					738181
310					1.18906e+06
311					1.42581e+06
312					1.63608e+06
n lipid	234	130	255	200	312	164
n forams	3	6	4	5	4	5
