# Supplementary material for: Mercury-Pollution Induction of Intracellular Lipid Accumulation and Lysosomal Compartment Amplification in the Benthic Foraminifer Ammonia parkinsoniana
Source: PLoS One. 2016 Sep 7;11(9):e0162401. doi: 10.1371/journal.pone.0162401 (PMC5014445; doi:10.1371/journal.pone.0162401)
Supplement: S2 Appendix — Significant differences are marked in bold. (XLS) [file pone.0162401.s002.xls]

## Sheet: Mann-Whitney test 1
Mann-Whitney U Test
Marked tests are significant at p <.05000	var. 1	var. 2	Rank sum 1	Rank sum 2	U	Z	p-level	Z-adjust	p-level	valid n. 1	valid n. 2
1x2	T1 control	T1 1 ppm	12	33	6	-0.774597	0.438579	-0.774597	0.438579	3	6
1x3	T1 control	T1 100 ppm	13	15	5	0.353553	0.723674	0.353553	0.723674	3	4
1x4	T1 control	T2 control	12	24	6	-0.447214	0.654721	-0.447214	0.654721	3	5
1x5	T1 control	T2 1ppm	13	15	5	0.353553	0.723674	0.353553	0.723674	3	4
1x6	T1 control	T2 100 ppm	6	30	0	-2.23607	0.025348	-2.23607	0.025348	3	5
2x3	T1 1 ppm	T1 100 ppm	39	16	6	1.2792	0.200826	1.2792	0.200826	6	4
2x4	T1 1 ppm	T2 control	39	27	12	0.547723	0.583883	0.547723	0.583883	6	5
2x5	T1 1 ppm	T2 1ppm	41	14	4	1.70561	0.0880825	1.70561	0.0880825	6	4
2x6	T1 1 ppm	T2 100 ppm	23	43	2	-2.37346	0.0176227	-2.37346	0.0176227	6	5
3x4	T1 100 ppm	T2 control	15	30	5	-1.22474	0.220672	-1.22474	0.220672	4	5
3x5	T1 100 ppm	T2 1ppm	18	18	8	0	1	0	1	4	4
3x6	T1 100 ppm	T2 100 ppm	10	35	0	-2.44949	0.0143064	-2.44949	0.0143064	4	5
4x5	T2 control	T2 1ppm	29	16	6	0.979796	0.327188	0.979796	0.327188	5	4
4x6	T2 control	T2 100 ppm	16	39	1	-2.40227	0.0162942	-2.40227	0.0162942	5	5
5x6	T2 1 ppm	T2 100 ppm	10	35	0	-2.44949	0.0143064	-2.44949	0.0143064	4	5
